# Supplementary material for: Infant High-Grade Gliomas Comprise Multiple Subgroups Characterized by Novel Targetable Gene Fusions and Favorable Outcomes
Source: Oxford University Press journal article supplement (doi:10.1158/2159-8290.cd-19-1030), 2020-04-02
Supplement: 21598290cd191030-sup-228399_2_supp_6163943_q7mmgq.xlsx [file 21598290cd191030-sup-228399_2_supp_6163943_q7mmgq.xlsx]

## Sheet: RTK fusions
Table S4, Related to Figure 3.
Sample_Name	Fusion	Copy_number	Fusion_panel	Whole_genome	Sanger	RNAseq
CHOW_INF_001	MAP2:ALK		Yes	Yes	Yes
CSMC_INF_001	HIP1:ALK	Yes	Yes		Yes	Yes
DKFZ_INF_301	ETV6:NTRK3	Yes
DKFZ_INF_302	MSI2:ALK	Yes				Yes
DKFZ_INF_303	ROS1	Yes
DKFZ_INF_307	MAD1L1:ALK	Yes				Yes
DKFZ_INF_308	MET	Yes
DKFZ_INF_312	MET	Yes
DKFZ_INF_313	PPP1CB:ALK	Yes				Yes
DKFZ_INF_314	PPP1CB:ALK	Yes				Yes
DKFZ_INF_315	ALK	Yes
DKFZ_INF_317	EML4:ALK	Yes
DKFZ_INF_318	CCDC88A:ALK	Yes				Yes
DKFZ_INF_324	EML4:NTRK3	Yes
DKFZ_INF_326	CCDC88A:ALK	Yes
DKFZ_INF_328	ALK	Yes
DKFZ_INF_330	ALK	Yes
DKFZ_INF_332	PPP1CB:ALK	Yes				Yes
DKFZ_INF_336	PPP1CB:ALK	Yes
DKFZ_INF_338	ROS1	Yes
DKFZ_INF_341	ETV6:NTRK3	Yes
DKFZ_INF_344	ALK	Yes
DKFZ_INF_345	ALK	Yes
DKFZ_INF_348	PPP1CB:ALK	Yes				Yes
DKFZ_INF_351	ALK	Yes
DKFZ_INF_356	ROS1	Yes
DKFZ_INF_357	ROS1	Yes
DKFZ_INF_361	EML4:ALK					Yes
DKFZ_INF_362	EML4:ALK					Yes
DKFZ_INF_366	CHCHD3:ROS1	Yes				Yes
DKFZ_INF_368	ETV6:NTRK3	Yes				Yes
DKFZ_INF_370	CCDC88A:ALK	Yes				Yes
DKFZ_INF_371	PPP1CB:ALK	Yes				Yes
DKFZ_INF_372	GOPC:ROS1	Yes				Yes
DKFZ_INF_373	SPECC1L:ALK	Yes				Yes
DKFZ_INF_G132	NTRK2	Yes
DKFZ_INF_G135	MET	Yes
DKFZ_INF_G170	ROS1	Yes
DKFZ_INF_G179	FGFR1:TACC1	Yes
DKFZ_INF_G251	ROS1	Yes
DKFZ_INF_ICGC34	NTRK2	Yes
EMUH_INF_001	CCDC88A:ALK	Yes				Yes
GOSH_INF_001	ETV6:NTRK3	Yes	Yes	Yes		Yes
GOSH_INF_002	MET	Yes		Yes
GOSH_INF_004	ETV6:NTRK3	Yes	Yes
GOSH_INF_005	SPECC1L:ALK	Yes	Yes	Yes	Yes	Yes
GOSH_INF_007	ETV6:NTRK3	Yes
GOSH_INF_011	HIP1:ALK	Yes	Yes
GOSH_INF_012	FGFR3:TACC3	Yes
GOSH_INF_017	PPP1CB:ALK	Yes		Yes
GOSH_INF_023	ROS1	Yes		Yes
GOSH_INF_026	ETV6:NTRK3	Yes	Yes		Yes	Yes
GOSH_INF_028	ROS1			Yes		Yes
KIFN_INF_001	ZC3H7A:ALK	Yes	Yes		Yes	Yes
KING_INF_001	FGFR1:TACC1	Yes
KING_INF_012	MET	Yes
KING_INF_018	KCTD16:NTRK2	Yes	Yes		Yes
MSKC_INF_001	GOPC:ROS1	Yes				Yes
MSKC_INF_006	ETV6:NTRK3					Yes
NUTH_INF_001	AGBL4:NTRK2		Yes
NUTH_INF_005	SYNDIG1L:ALK	Yes	Yes		Yes	Yes
OHSU_INF_001	CCDC88A:ALK					Yes
OPBG_INF_001	ETV6:NTRK3		Yes
OPBG_INF_005	KCTD8:NTRK2		Yes
OPBG_INF_019	KIF5B:NTRK2	Yes	Yes		Yes	Yes
OPBG_INF_035	ETV6:NTRK3		Yes
PMHK_INF_001	ROS1	Yes		Yes		Yes
QCTB_INF_R077	ETV6:NTRK3	Yes	Yes	Yes	Yes
QCTB_INF_R102	TPM3:NTRK1		Yes
SMHB_INF_002	EML4:ALK	Yes	Yes
SMHB_INF_003	CCDC88A:ALK	Yes		Yes
SMHB_INF_007	EML4:NTRK3		Yes
SPHR_INF_001	PRKAR2A:ALK		Yes		Yes
STJU_INF_001	TPM3:NTRK1			Yes		Yes
STJU_INF_005	TPM3:NTRK1			Yes		Yes
STJU_INF_006	ETV6:NTRK3			Yes		Yes
STJU_INF_013	AGBL4:NTRK2			Yes		Yes
STJU_INF_014	PPP1CB:ALK	Yes
STJU_INF_015	CLIP2:ALK	Yes
STJU_INF_016	ALK	Yes
STJU_INF_017	SPTBN1:ALK	Yes
UOLP_INF_001	EML4:ALK					Yes
WFSM_INF_001	CCDC88A:ALK					Yes
