# Supplementary material for: Infant High-Grade Gliomas Comprise Multiple Subgroups Characterized by Novel Targetable Gene Fusions and Favorable Outcomes
Source: Oxford University Press journal article supplement (doi:10.1158/2159-8290.cd-19-1030), 2020-04-02
Supplement: 21598290cd191030-sup-228399_2_supp_6163945_q7kkgr.xlsx [file 21598290cd191030-sup-228399_2_supp_6163945_q7kkgr.xlsx]

## Sheet: Histopathology
Table S6, Related to Figure 5.
Study_ID	Focal_ganglion_cells	Pleomorphism	Spindle_cells	Gemistocytic_cells	Mitoses	Vascular_proliferation	Uniform_architcture	Necrosis	Fusion	Ki67
CHOW_INF_001	no	no	YES	no	YES	no	YES	no	MAP2:ALK	13.0845
CSMC_INF_001	no	YES	no	no	no	no	YES	YES	ALK:HIP1/UNC79	NA
GOSH_INF_001	no	YES	no	no	YES	YES	no	YES	ETV6:NTRK3	22.529
GOSH_INF_002	no	YES	YES	no	YES	no	no	YES	MET	13.368
GOSH_INF_003	no	no	YES	YES	no	no	YES	no	None	25.3793
GOSH_INF_004	no	no	no	YES	no	YES	YES	YES	ETV6:NTRK3	13.4198
GOSH_INF_005	no	YES	no	YES	YES	YES	YES	YES	SPECC1L1:ALK	35.6927
GOSH_INF_007	no	YES	YES	no	no	no	YES	YES	ETV6:NTRK3	20.8967
GOSH_INF_008	no	no	no	YES	no	no	no	YES	None	14.6642
GOSH_INF_011	no	no	no	YES	YES	YES	no	YES	ALK:HIP1	NA
KIFN_INF_001	no	YES	no	no	YES	no	YES	YES	ALK:ZC3H7A	NA
KING_INF_014	no	no	no	YES	no	YES	no	YES	None	5.63342
NUTH_INF_005	no	no	no	no	YES	YES	YES	YES	SYNDIG1L:ALK	30.1611
OPBG_INF_035	no	YES	no	YES	no	no	no	YES	ETV6:NTRK3	43.8703
PMHK_INF_001	no	no	YES	no	no	no	no	YES	None	3.23867
QCTB_INF_R077	no	no	YES	YES	YES	no	YES	no	ETV6:NTRK3	29.1143
SMHB_INF_003	NA	NA	NA	NA	NA	NA	NA	NA	CCDC88A:ALK	2.34077
SPHR_INF_001	no	no	YES	no	YES	YES	YES	YES	PRKAR2A:ALK	7.73883
STGH_INF_001	no	no	no	YES	no	YES	no	no	None	NA
UKEH_INF_005	no	YES	YES	no	YES	no	no	no	None	2.4894
UOLP_INF_001	YES	no	no	no	YES	YES	no	YES	EML4:ALK	18.1043
